# Supplementary material
Source: PubMed Central journal article supplement (PMC3433599)
Supplement: mmc1.pdf [file mmc1.pdf]

## **Supporting Material**

# The $\alpha$ -Helix to $\beta$ -Sheet Transition in Stretched and Compressed Hydrated Fibrin Clots

Rustem I. Litvinov,<sup>\*</sup> Dzhigangir A. Faizullin,<sup>†</sup> Yuriy F. Zuev,<sup>†</sup> and John W. Weisel<sup>\*,‡</sup>

<sup>\*</sup>Department of Cell and Developmental Biology, Perelman School of Medicine, University of Pennsylvania, Philadelphia, PA, USA; <sup>†</sup>Kazan Institute of Biochemistry and Biophysics, Russian Academy of Sciences, Kazan, Russia

<sup>‡</sup>Corresponding author: John W. Weisel, Phone: (215) 898-3573, Fax: (215) 898-9871  
E-mail: [weisel@mail.med.upenn.edu](mailto:weisel@mail.med.upenn.edu)

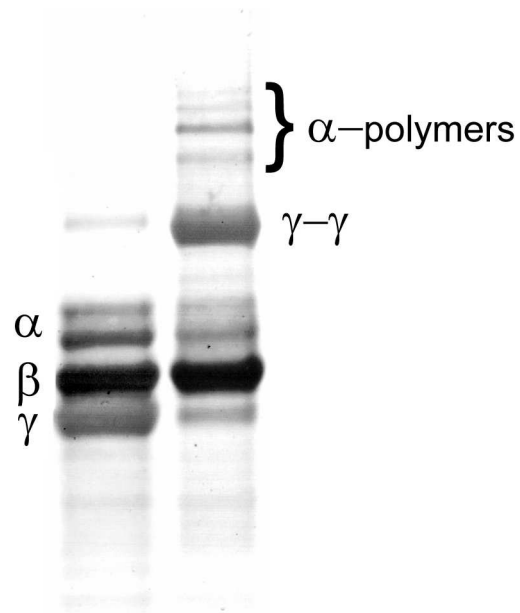

Figure S1. SDS-PAGE in reducing conditions showing the polypeptide composition of mostly uncross-linked human fibrin (left lane) and fibrin heavily cross-linked with the plasma transglutaminase, factor XIIIa (right lane). The cross-linking results in formation of the  $\gamma$ -chain dimers and  $\alpha$ -chain polymers which dramatically change mechanical and rheological properties of individual fibrin fibers and an entire clot (1-3).

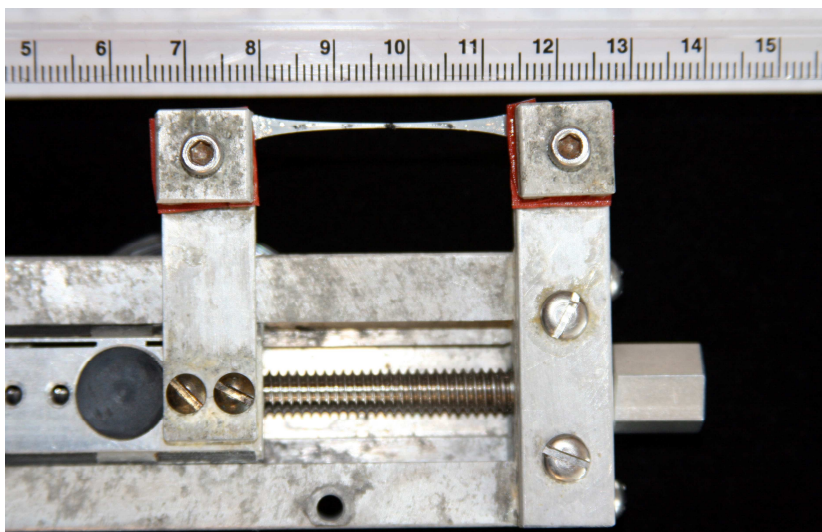

Figure S2. Photograph of a cylindrical plasma clot stretched 3-fold in the custom-built stretching device.

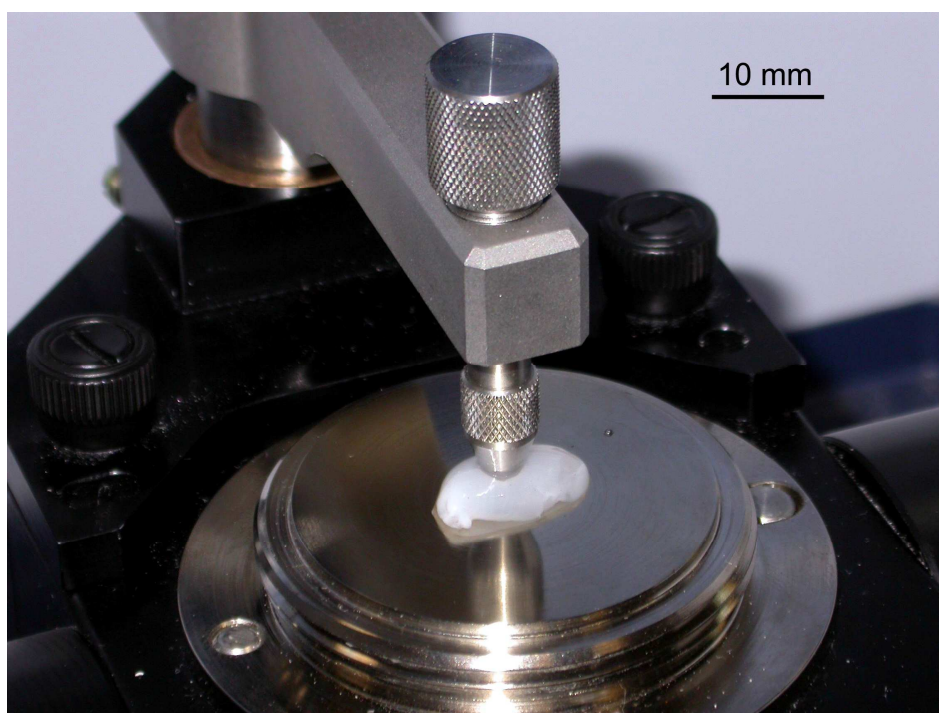

Figure S3. Photograph of a plasma clot compressed directly on the ATR crystal with a pressure calibrated metal knob. The compressed area represents a 2-mm-circle equal to the detecting spot of the ATR crystal.

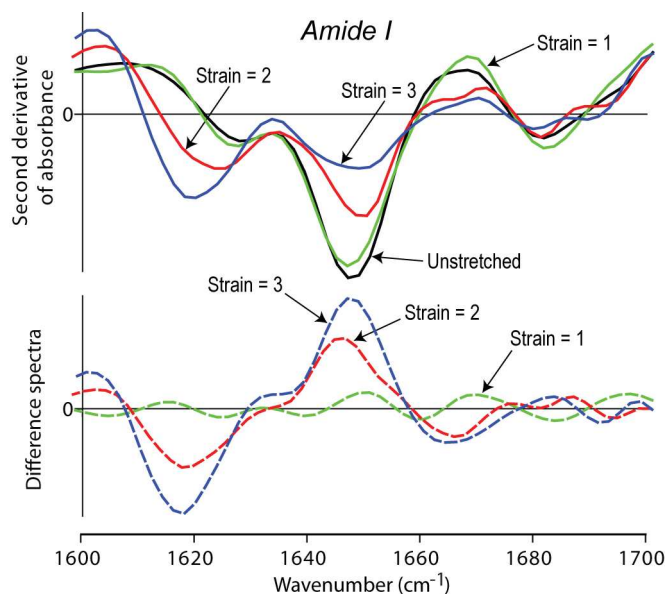

Figure S4. The second derivative spectra of the amide I band of unstretched clot (black line) and the same clot after 2-fold (green solid line), 3-fold (red solid line) and 4-fold (blue solid line) elongation along with their difference spectra (dashed lines of the corresponding color) obtained by subtraction of the second derivative for the initial unstretched clot. The sine-like difference spectrum for strain 1 (green dashed line) reflects minor random fluctuations around zero. Strain is defined as “stretched length/initial length-1”. The curves are derived from the raw data shown in Fig. 2.

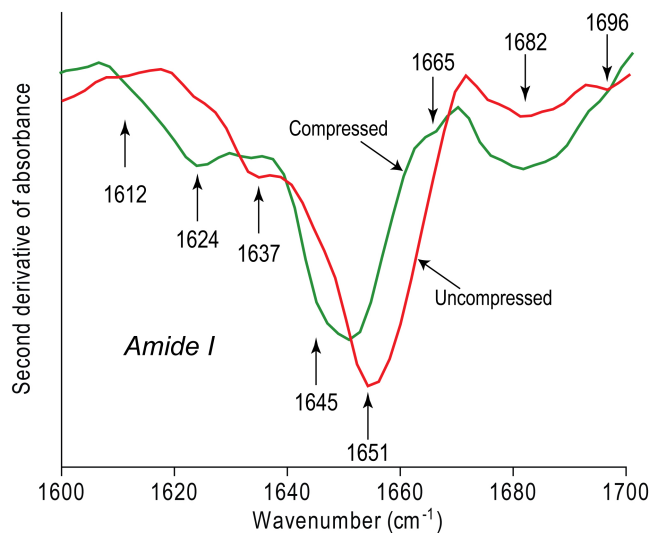

Figure S5. The second derivative spectra of the amide I band of uncompressed (red) and compressed (green) fibrin clots. Peak positions of underlying components are shown by arrows.

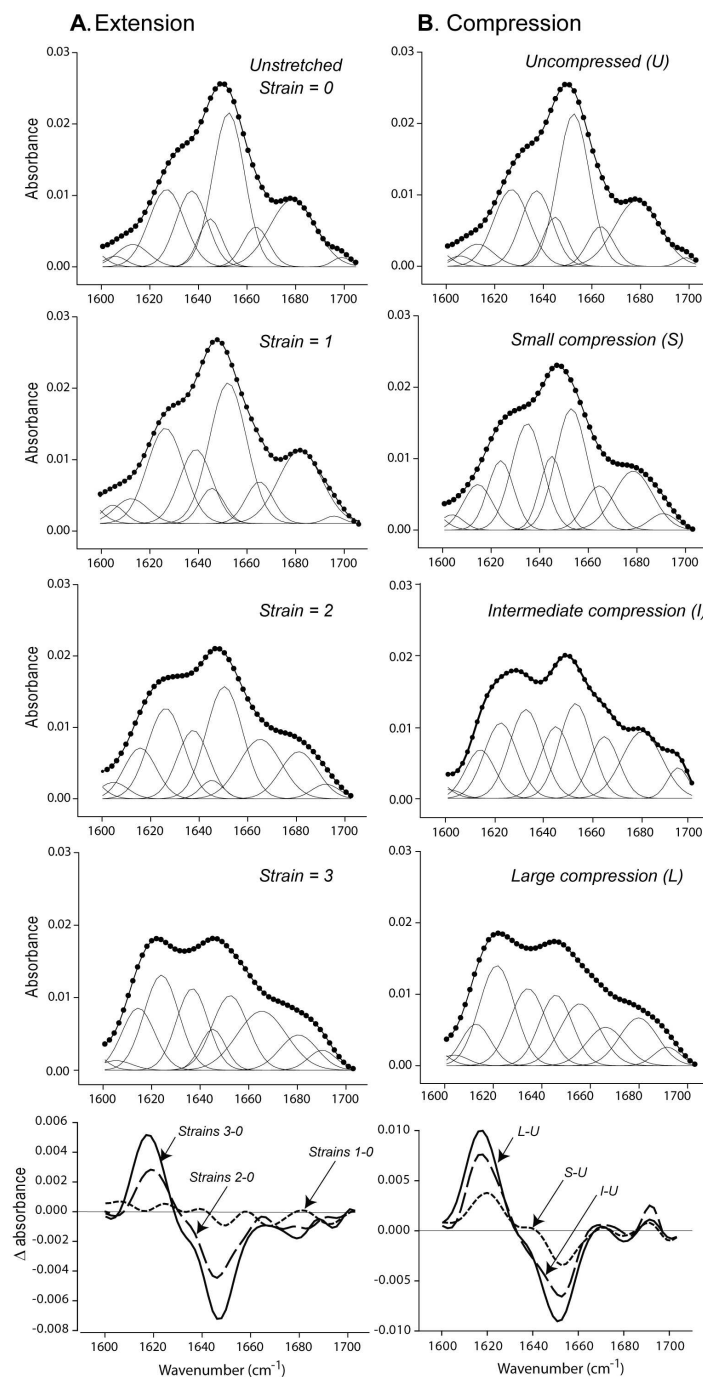

Figure S6. Deconvolution of resolution-enhanced FTIR ATR spectra (amide I band) of fibrin clots: **(A)** unstretched (strain 0) and stretched at three different strains (strains 1, 2, and 3) along with the difference spectra (bottom) for each strain (1-0, 2-0, and 3-0, respectively) obtained by subtraction of the initial spectrum for the unstretched clot. **(B)** Uncompressed (U) and compressed at a relatively small (S, 10-50 bar), intermediate (I, 100-150 bar), and large (L, 200-250 bar) pressure along with the difference spectra (bottom) for each compression (S-U, I-U, and L-U, respectively) obtained by subtraction of the initial spectrum (U) for the uncompressed clot.

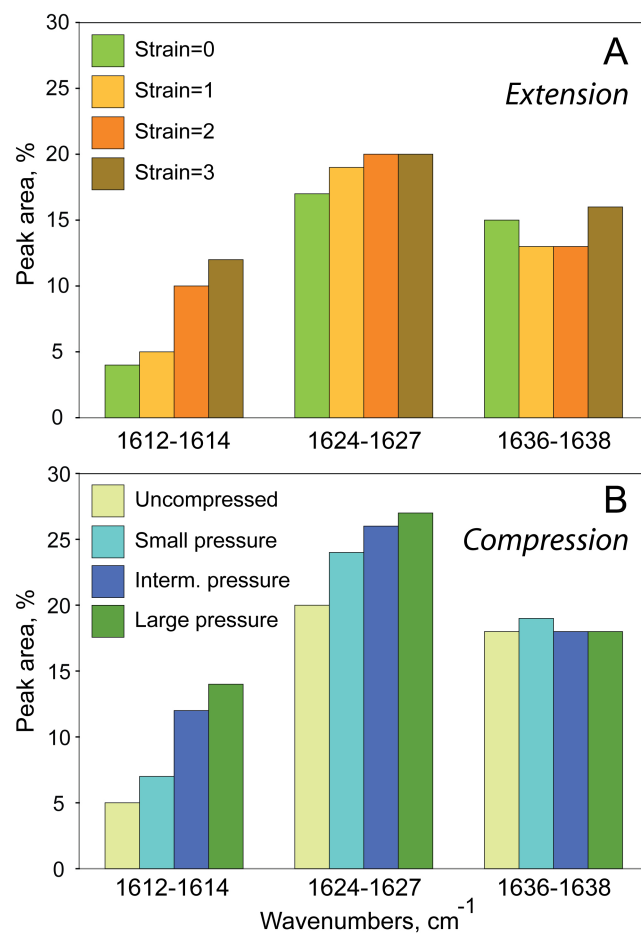

Figure S7. Changes in the proportion of major types of the  $\beta$ -structures peaked at 1612-1614  $\text{cm}^{-1}$ , 1624-1627  $\text{cm}^{-1}$ , and 1636-1638  $\text{cm}^{-1}$  in FTIR spectra of fibrin clots at different degrees of extension (**A**) and compression (**B**). The figure is based on the data in Tables S1-S8.

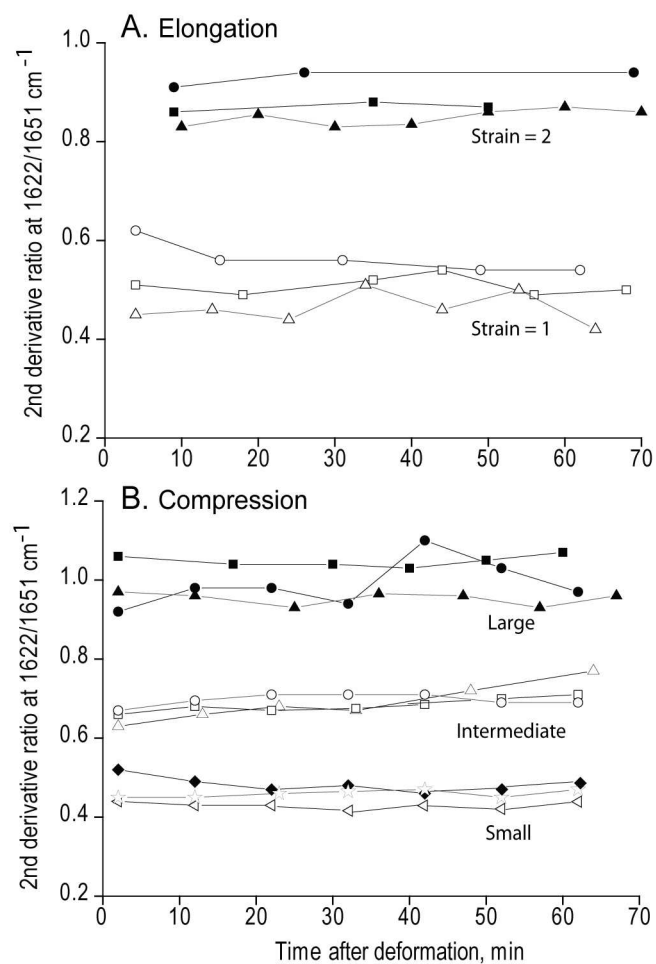

Figure S8. Time course of the deformation-induced changes in FTIR ATR spectra of fibrin clots. The ratio of second derivative absorbance intensities at 1622/1651  $\text{cm}^{-1}$  in **(A)** stretched fibrin clots at different strains (1 and 2) and **(B)** in compressed fibrin clots at different pressures (small, intermediate, and large) as a function of time after the deformations. Three individual clots were followed under each experimental condition of deformation.

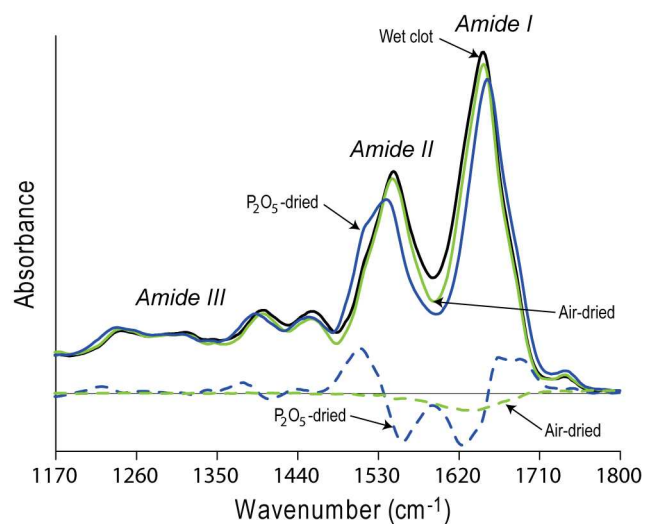

Figure S9. FTIR ATR spectral changes during stepwise dehydration of a plasma clot. Black spectrum – initial wet clot, green solid spectrum – the air-dried clot (dashed green line – the corresponding difference spectrum), blue solid spectrum – the clot thoroughly dried over P<sub>2</sub>O<sub>5</sub> (dashed blue line – the corresponding difference spectrum).

## Quantification of the secondary structure elements

Table S1. Unstretched fibrin clot

| <i>Centroid, cm<sup>-1</sup></i> | <i>Height</i> | <i>Area</i> | <i>FWHM, cm<sup>-1</sup></i> | <i>Assignment</i> |
|----------------------------------|---------------|-------------|------------------------------|-------------------|
| 1698.92                          | 0.00133       | 0.01054     | 8.64395                      | β-structures      |
| 1678.73                          | 0.00943       | 0.1891      | 21.9296                      | turns             |
| 1663.61                          | 0.00557       | 0.06375     | 12.5082                      | turns/loops       |
| 1652.45                          | 0.02158       | 0.30371     | 15.3883                      | α-helix           |
| 1644.8                           | 0.00672       | 0.06909     | 11.2354                      | random coils      |
| 1637.22                          | 0.01064       | 0.14696     | 15.0989                      | β-structures      |
| 1626.89                          | 0.01083       | 0.16937     | 17.1033                      | β-structures      |
| 1612.9                           | 0.00314       | 0.04428     | 15.4101                      | β-structures      |

Summarized content

|                          | Mean value | Standard deviation | COV*  |
|--------------------------|------------|--------------------|-------|
| α-helix                  | 0.30371    | 0.0355             | 0.117 |
| β-sheets                 | 0.37115    | 0.03934            | 0.106 |
| turns/random coils/loops | 0.32195    | 0.0314             | 0.097 |

\*Coefficient of variation (COV) = (Standard deviation) / (Mean value)

Table S2. 2-fold stretched fibrin clot (strain=1)

| <i>Centroid, cm<sup>-1</sup></i> | <i>Height</i> | <i>Area</i> | <i>FWHM, cm<sup>-1</sup></i> | <i>Assignment</i> |
|----------------------------------|---------------|-------------|------------------------------|-------------------|
| 1693.07                          | 8.36519E-4    | 0.0077      | 8.64394                      | β-structures      |
| 1679.7                           | 0.00822       | 0.17648     | 20.1596                      | turns             |
| 1663.61                          | 0.00468       | 0.06231     | 12.5082                      | turns/loops       |
| 1651.2                           | 0.01577       | 0.28886     | 17.2041                      | α-helix           |
| 1644.8                           | 0.00395       | 0.04729     | 11.2354                      | random coils      |
| 1638.5                           | 0.00831       | 0.1335      | 15.0989                      | β-structures      |
| 1626.44                          | 0.01069       | 0.19465     | 17.1033                      | β-structures      |
| 1612.9                           | 0.00278       | 0.0456      | 15.4101                      | β-structures      |

Summarized content

|                          |         |
|--------------------------|---------|
| α-helix                  | 0.30203 |
| β-sheets                 | 0.39884 |
| turns/random coils/loops | 0.29912 |

Table S3. 3-fold stretched fibrin clot (strain=2)

| <i>Centroid, cm<sup>-1</sup></i> | <i>Height</i> | <i>Area</i> | <i>FWHM, cm<sup>-1</sup></i> | <i>Assignment</i> |
|----------------------------------|---------------|-------------|------------------------------|-------------------|
| 1692.11                          | 0.00205       | 0.025       | 13.349                       | β-structures      |
| 1681.06                          | 0.0066        | 0.10772     | 17.9008                      | turns             |
| 1665.12                          | 0.00833       | 0.15409     | 20.2803                      | turns/loops       |
| 1650.37                          | 0.0157        | 0.25178     | 17.5748                      | α-helix           |
| 1645.2                           | 0.00259       | 0.02537     | 10.7309                      | random coils      |
| 1637.51                          | 0.00959       | 0.1346      | 15.3909                      | β-structures      |
| 1626.2                           | 0.01267       | 0.20053     | 17.3529                      | β-structures      |
| 1615.68                          | 0.00712       | 0.10093     | 15.5384                      | β-structures      |

Summarized content

|                          |         |
|--------------------------|---------|
| α-helix                  | 0.25178 |
| β-sheets                 | 0.46106 |
| turns/random coils/loops | 0.28718 |

Table S4. 4-fold stretched fibrin clot (strain=3)

| <i>Centroid, cm<sup>-1</sup></i> | <i>Height</i> | <i>Area</i> | <i>FWHM, cm<sup>-1</sup></i> | <i>Assignment</i> |
|----------------------------------|---------------|-------------|------------------------------|-------------------|
| 1690.22                          | 0.00276       | 0.03385     | 13.3978                      | β-structures      |
| 1680.5                           | 0.00486       | 0.07988     | 17.9538                      | turns             |
| 1665.36                          | 0.00814       | 0.17782     | 23.8528                      | turns/loops       |
| 1652.33                          | 0.01029       | 0.16247     | 17.2536                      | α-helix           |
| 1645.2                           | 0.00566       | 0.06253     | 12.0724                      | random coils      |
| 1636.72                          | 0.01125       | 0.15777     | 15.3147                      | β-structures      |
| 1624.04                          | 0.01311       | 0.20112     | 16.7528                      | β-structures      |
| 1614.5                           | 0.00855       | 0.12456     | 15.9041                      | β-structures      |

Summarized content

|                          |         |
|--------------------------|---------|
| α-helix                  | 0.16247 |
| β-sheets                 | 0.5173  |
| turns/random coils/loops | 0.32023 |

Table S5. Uncompressed fibrin clot

| <i>Centroid, cm<sup>-1</sup></i> | <i>Height</i> | <i>Area</i> | <i>FWHM, cm<sup>-1</sup></i> | <i>Assignment</i> |
|----------------------------------|---------------|-------------|------------------------------|-------------------|
| 1698.38                          | 0.00114       | 0.00858     | 7.08076                      | β-structures      |
| 1678.72                          | 0.00961       | 0.21898     | 21.3971                      | turns             |
| 1663.62                          | 0.00592       | 0.07897     | 12.5246                      | turns/loops       |
| 1652.49                          | 0.02257       | 0.36746     | 15.2964                      | α-helix           |
| 1644.83                          | 0.00734       | 0.08808     | 11.2717                      | random coils      |
| 1637.18                          | 0.01107       | 0.17784     | 15.0989                      | β-structures      |
| 1626.96                          | 0.01113       | 0.20266     | 17.1033                      | β-structures      |
| 1613.57                          | 0.00286       | 0.04685     | 15.4101                      | β-structures      |

Summarized content

|                          |         |
|--------------------------|---------|
| α-helix                  | 0.31038 |
| β-sheets                 | 0.37192 |
| turns/random coils/loops | 0.32357 |

Table S6. Fibrin clot under small compression

| <i>Centroid, cm<sup>-1</sup></i> | <i>Height</i> | <i>Area</i> | <i>FWHM, cm<sup>-1</sup></i> | <i>Assignment</i> |
|----------------------------------|---------------|-------------|------------------------------|-------------------|
| 1692.44                          | 0.00146       | 0.01815     | 11.6953                      | β-structures      |
| 1678.13                          | 0.00894       | 0.20366     | 21.397                       | turns             |
| 1663.85                          | 0.00564       | 0.07525     | 12.5246                      | turns/loops       |
| 1652.49                          | 0.01785       | 0.2906      | 15.2964                      | α-helix           |
| 1644.83                          | 0.00741       | 0.08889     | 11.2717                      | random coils      |
| 1637.18                          | 0.01185       | 0.19045     | 15.0989                      | β-structures      |
| 1624.89                          | 0.01305       | 0.2375      | 17.1033                      | β-structures      |
| 1611.77                          | 0.00426       | 0.06993     | 15.4101                      | β-structures      |

Summarized content

|                          |         |
|--------------------------|---------|
| α-helix                  | 0.25026 |
| β-sheets                 | 0.44135 |
| turns/random coils/loops | 0.31214 |

Table S7. Fibrin clot under intermediate compression

| <i>Centroid, cm<sup>-1</sup></i> | <i>Height</i> | <i>Area</i> | <i>FWHM, cm<sup>-1</sup></i> | <i>Assignment</i> |
|----------------------------------|---------------|-------------|------------------------------|-------------------|
| 1691.42                          | 6.3671E-4     | 0.00536     | 7.90788                      | β-structures      |
| 1678.57                          | 0.00843       | 0.22518     | 25.099                       | turns             |
| 1664.96                          | 0.00459       | 0.06519     | 13.3519                      | turns/loops       |
| 1653.24                          | 0.0139        | 0.2263      | 15.2964                      | α-helix           |
| 1644.83                          | 0.00698       | 0.08369     | 11.2717                      | random coils      |
| 1637.18                          | 0.01118       | 0.17962     | 15.0989                      | β-structures      |
| 1624.27                          | 0.01451       | 0.26414     | 17.1033                      | β-structures      |
| 1613.57                          | 0.0071        | 0.11644     | 15.4101                      | β-structures      |

Summarized content

|                          |         |
|--------------------------|---------|
| α-helix                  | 0.19026 |
| β-sheets                 | 0.48123 |
| turns/random coils/loops | 0.33112 |

Table S8. Fibrin clot under large compression

| <i>Centroid, cm<sup>-1</sup></i> | <i>Height</i> | <i>Area</i> | <i>FWHM, cm<sup>-1</sup></i> | <i>Assignment</i> |
|----------------------------------|---------------|-------------|------------------------------|-------------------|
| 1691.71                          | 7.65398E-4    | 0.00595     | 7.30041                      | β-structures      |
| 1678.77                          | 0.00802       | 0.22057     | 25.823                       | turns             |
| 1663.74                          | 0.00571       | 0.09217     | 15.1674                      | turns/loops       |
| 1652.49                          | 0.01173       | 0.19106     | 15.2964                      | α-helix           |
| 1644.83                          | 0.00623       | 0.07469     | 11.2717                      | random coils      |
| 1636.58                          | 0.01151       | 0.18499     | 15.0989                      | β-structures      |
| 1623.49                          | 0.01461       | 0.26598     | 17.1033                      | β-structures      |
| 1613.28                          | 0.00826       | 0.13543     | 15.4101                      | β-structures      |

Summarized content

|                          |         |
|--------------------------|---------|
| α-helix                  | 0.16467 |
| β-sheets                 | 0.51243 |
| turns/random coils/loops | 0.33214 |

## Supporting references

1. Collet, J. P., H. Shuman, R. E. Ledger, S. Lee, and J. W. Weisel. 2005. The elasticity of an individual fibrin fiber in a clot. *Proc Natl Acad Sci U S A* 102:9133-9137.
2. Liu, W., L. M. Jawerth, E. A. Sparks, M. R. Falvo, R. R. Hantgan, R. Superfine, S. T. Lord, and M. Guthold. 2006. Fibrin fibers have extraordinary extensibility and elasticity. *Science* 313:634.
3. Brown, A. E. X., R. I. Litvinov, D. E. Discher, P. K. Purohit, and J. W. Weisel. 2009. Multiscale mechanics of fibrin polymer: gel stretching with protein unfolding and loss of water. *Science* 325:741-744.
